# Supplementary material for: Band alignment and optical features in Janus-MoSeTe/X(OH)2 (X = Ca, Mg) van der Waals heterostructures
Source: Royal Society of Chemistry journal article supplement (doi:10.1039/c9cp06019g), 2019-01-01
Supplement: c9cp06019g1.pdf [file c9cp06019g1.pdf]

Supporting Information (SI)

**Band alignment and optical features in Janus-MoSeTe/X(OH)<sub>2</sub> (X = Ca, Mg)  
van der Waals heterostructures**

Dat D.Vo<sup>1,2</sup>, Tuan V. Vu<sup>1,2</sup>, Nguyen V. Hieu<sup>3</sup>,  
Nguyen N. Hieu<sup>4</sup>, Huynh V. Phuc<sup>5</sup>, Nguyen T. T. Binh<sup>4,\*</sup>, Le T.T. Phuong, M. Idrees<sup>6</sup>, Bin Amin<sup>7</sup>,  
Chuong V. Nguyen<sup>8,\*</sup>

*<sup>1</sup>Division of Computational Physics, Institute for Computational Science,  
Ton Duc Thang University, Ho Chi Minh City, Vietnam*

*<sup>2</sup>Faculty of Electrical & Electronics Engineering, Ton Duc Thang University, Ho Chi Minh City, Vietnam*

*<sup>3</sup>Department of Physics, University of Education, The University of Da Nang, Da Nang, Vietnam*

*<sup>4</sup>Institute of Research and Development, Duy Tan University, Da Nang 550000, Vietnam*

*<sup>5</sup>Division of Theoretical Physics, Dong Thap University, Cao Lanh 870000, Vietnam*

*<sup>6</sup>Department of Physics, University of Education, Hue University, Hue, Vietnam.*

*<sup>7</sup>Department of Physics, Hazara University, Mansehra 21300, Pakistan*

*<sup>8</sup>Department of Physics, Abbottabad University of Science and Technology, Abbottabad  
22010, Pakistan*

*<sup>9</sup>Department of Materials Science and Engineering, Le Quy Don Technical University,  
Ha Noi, Vietnam*

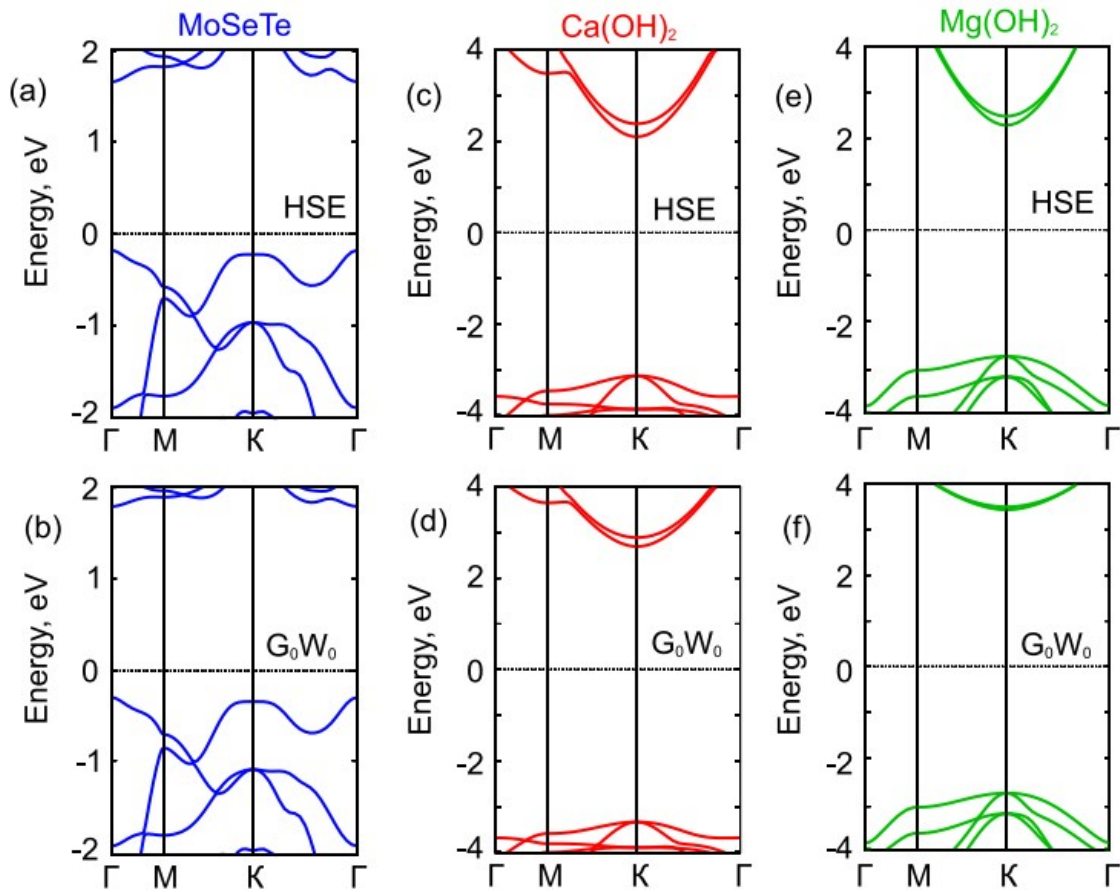

Fig. S1. Band structures of (a, b) Janus-MoSeTe, (c, d)  $\text{Ca(OH)}_2$  and (e, f)  $\text{Mg(OH)}_2$  monolayers at the equilibrium state calculated by (HSE,  $G_0W_0$ ) methods, respectively.

To obtain more accurate band structure, we apply the HSE06 and  $G_0W_0$  methods. The calculated band structures of Janus-MoSeTe,  $\text{Ca(OH)}_2$  and  $\text{Mg(OH)}_2$  monolayers at the equilibrium state with HSE06 and  $G_0W_0$  methods are depicted in Fig. S1. The band gaps of the Janus-MoSeTe,  $\text{Ca(OH)}_2$  and  $\text{Mg(OH)}_2$  monolayers given by PBE/HSE06/ $G_0W_0$  methods are calculated to be 1.27/1.71/2.14 eV, 3.68/5.18/5.86 eV, and 3.25/4.75/6.51 eV, respectively. However, despite the band gaps, the dispersions of the band structures with three methods exhibit the similar tendency in both valence band maximum and conduction band minimum. Thus, the PBE functional is used here and reliable results can be expected. In addition, both HSE06 and  $G_0W_0$  calculations are enormously computationally intensive and demanding as compared to PBE method. Therefore, the electronic properties of the  $\text{MoSeTe/X(OH)}_2$  at the equilibrium state and under electric field have been computed using the PBE functional in our present study. Whereas, the optical properties of such heterostructures are obtained by solving the Bethe-Salpeter equation (BSE) on top of single-shot  $G_0W_0$  calculations, that include screening and excitonic effects.

\*Corresponding authors: [chuongnguyen11@gmail.com](mailto:chuongnguyen11@gmail.com) (C. V. Nguyen); [nguyenthanhbinh8@duytan.edu.vn](mailto:nguyenthanhbinh8@duytan.edu.vn) (N.T.T Binh)

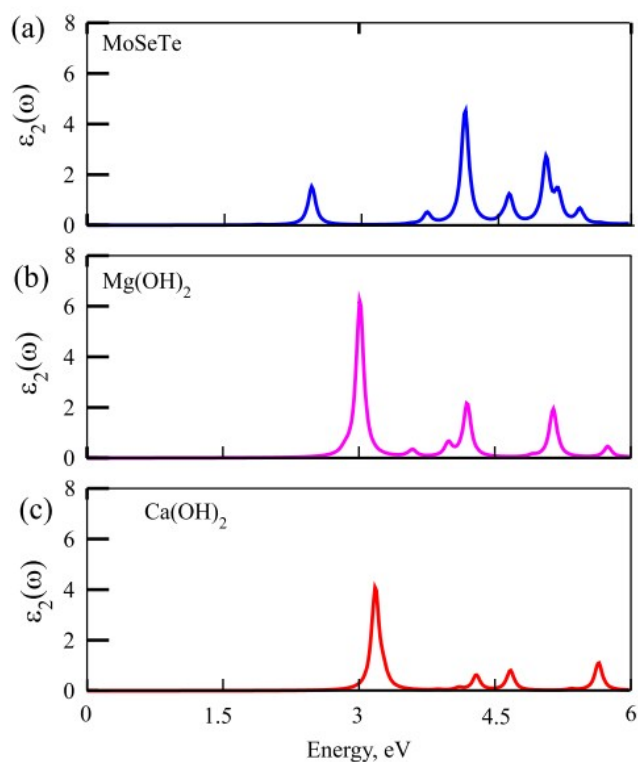

Fig. S2. Imaginary part of the dielectric function of the isolated (a) MoSeTe, (b) Mg(OH)<sub>2</sub> and (c) Ca(OH)<sub>2</sub> monolayers.

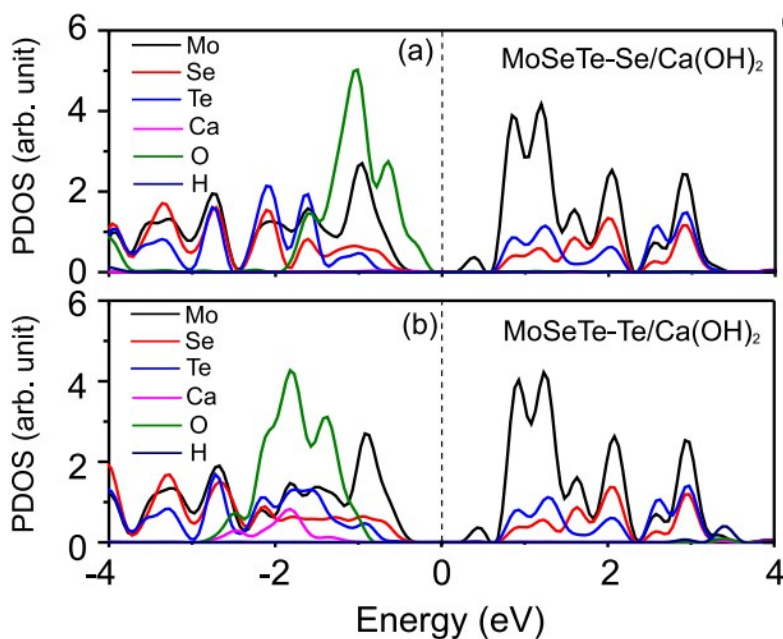

Fig. S3. Partial density states (PDOS) of the MoSeTe-Se/Ca(OH)<sub>2</sub> and (b) MoSeTe-Te/Ca(OH)<sub>2</sub> heterostructures. The Fermi level is set to be zero and marked by the dashed line.

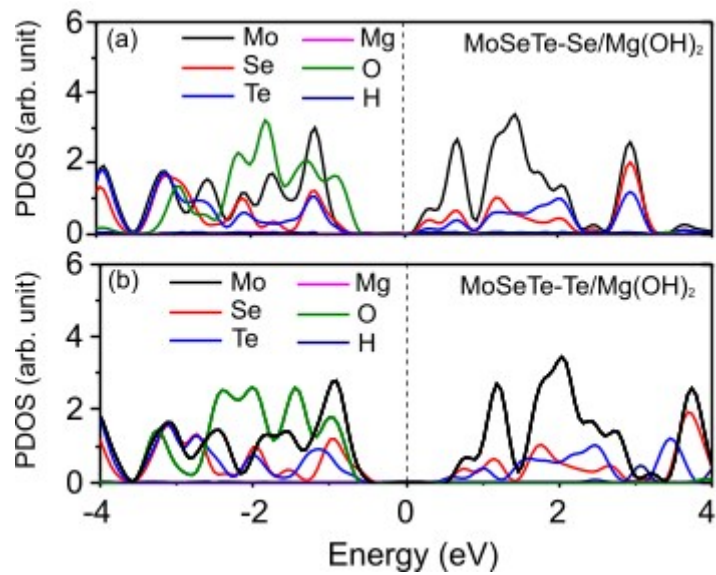

Fig. S4. Partial density states (PDOS) of the MoSeTe-Se/Mg(OH)<sub>2</sub> and (b) MoSeTe-Te/Mg(OH)<sub>2</sub> heterostructures. The Fermi level is set to be zero and marked by the dashed line.
